# Supplementary material for: A selective ratiometric fluoride ion sensor with a (2,4-dinitrophenyl)hydrazine derivative of bis(indolyl) methane and its mode of interaction
Source: Royal Society of Chemistry journal article supplement (doi:10.1039/c4nj02223h), 2015-01-01
Supplement: c4nj02223h1.pdf [file c4nj02223h1.pdf]

# **A selective ratiometric fluoride ion sensor with (2,4-dinitro phenyl)hydrazine derivative of bis (indolyl) methane and its mode of interaction**

Rupa Pegu,<sup>a</sup> Rajesh Mandal,<sup>a</sup> Ankur Kanti Guha,<sup>b</sup> and Sanjay Pratihar<sup>a,\*</sup>

[spratihar@tezu.ernet.in](mailto:spratihar@tezu.ernet.in), [spratihar29@gmail.com](mailto:spratihar29@gmail.com)

<sup>a</sup>Department of chemical sciences, Tezpur University, Napaam, Asaam-784028, India

<sup>b</sup>Department of Chemistry, Cotton College State University, Panbazar, Guwahati, Assam, India-  
781001

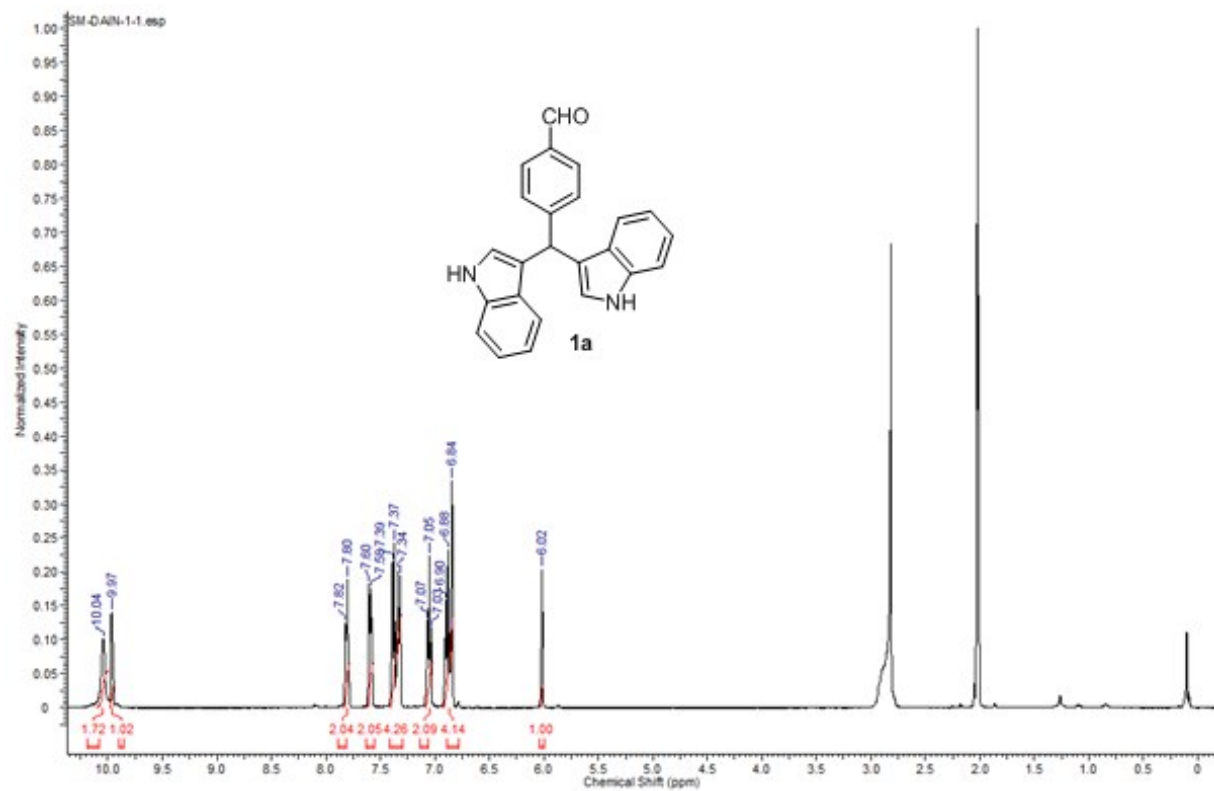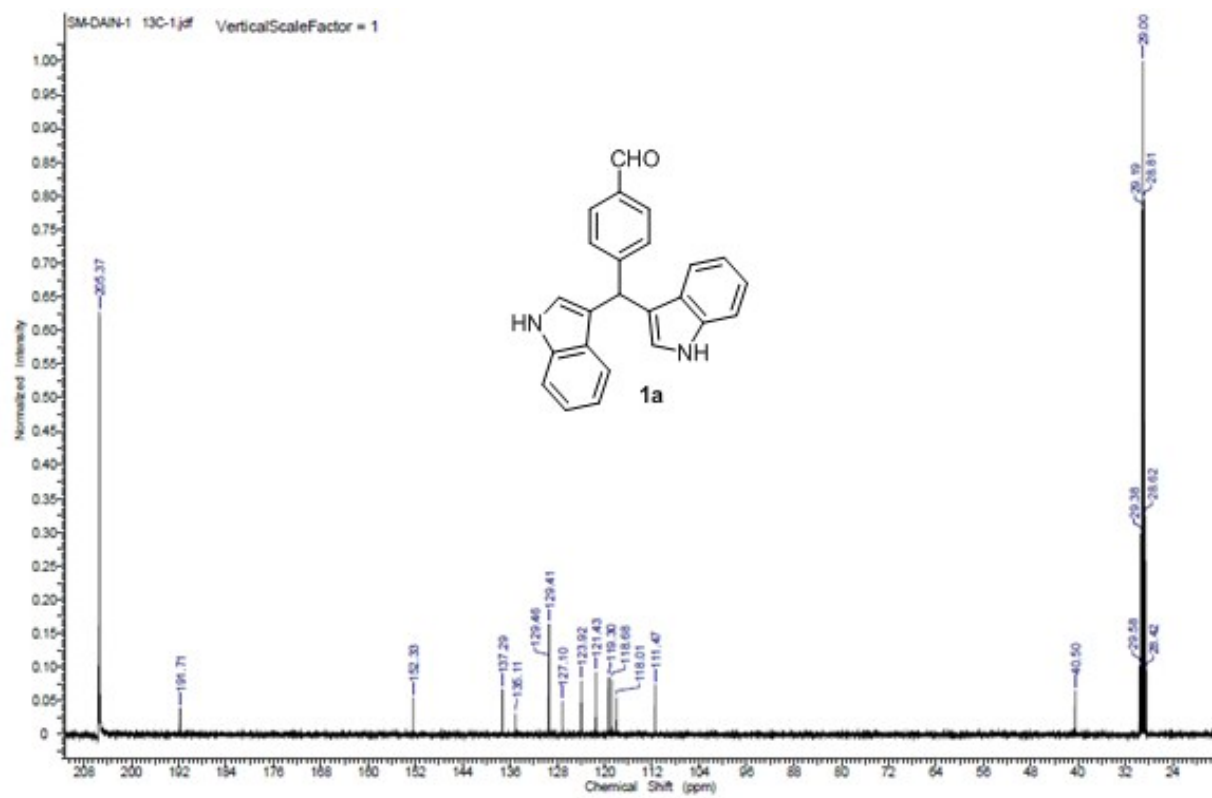

Fig. S1.  $^1\text{H}$  and  $^{13}\text{C}$  NMR data of compound **1a** in acetone- $d_6$ .

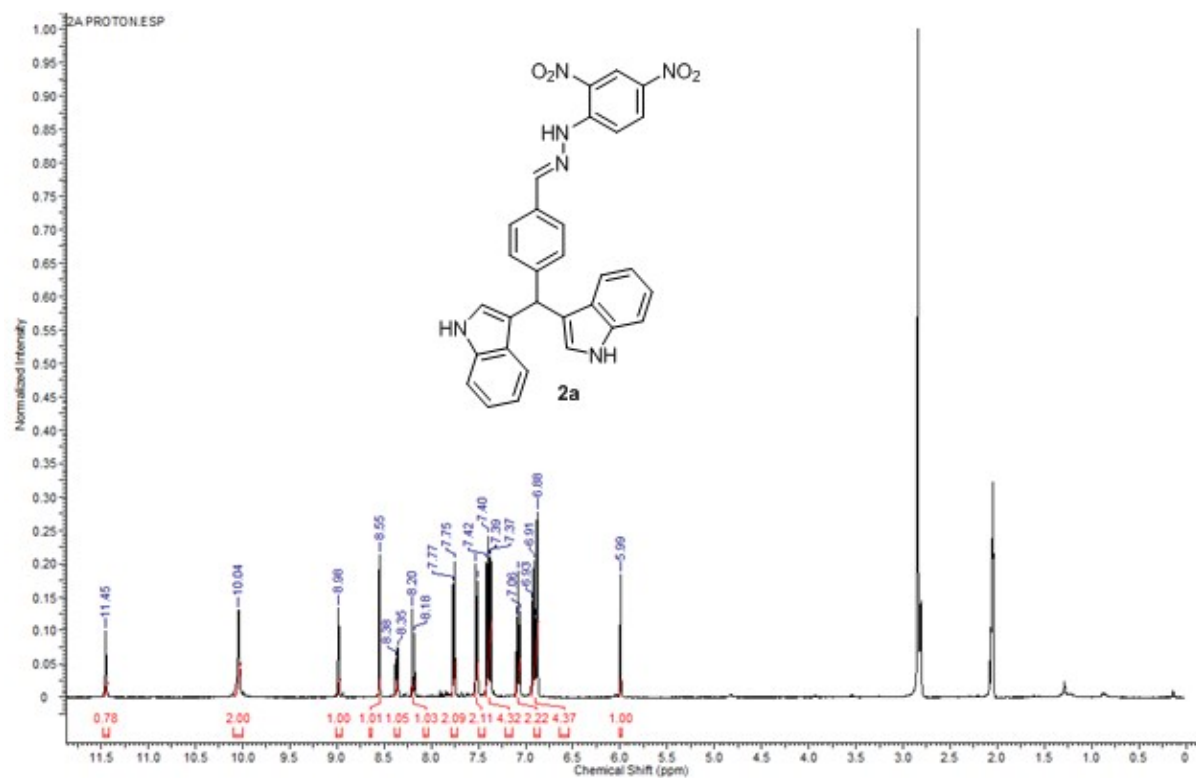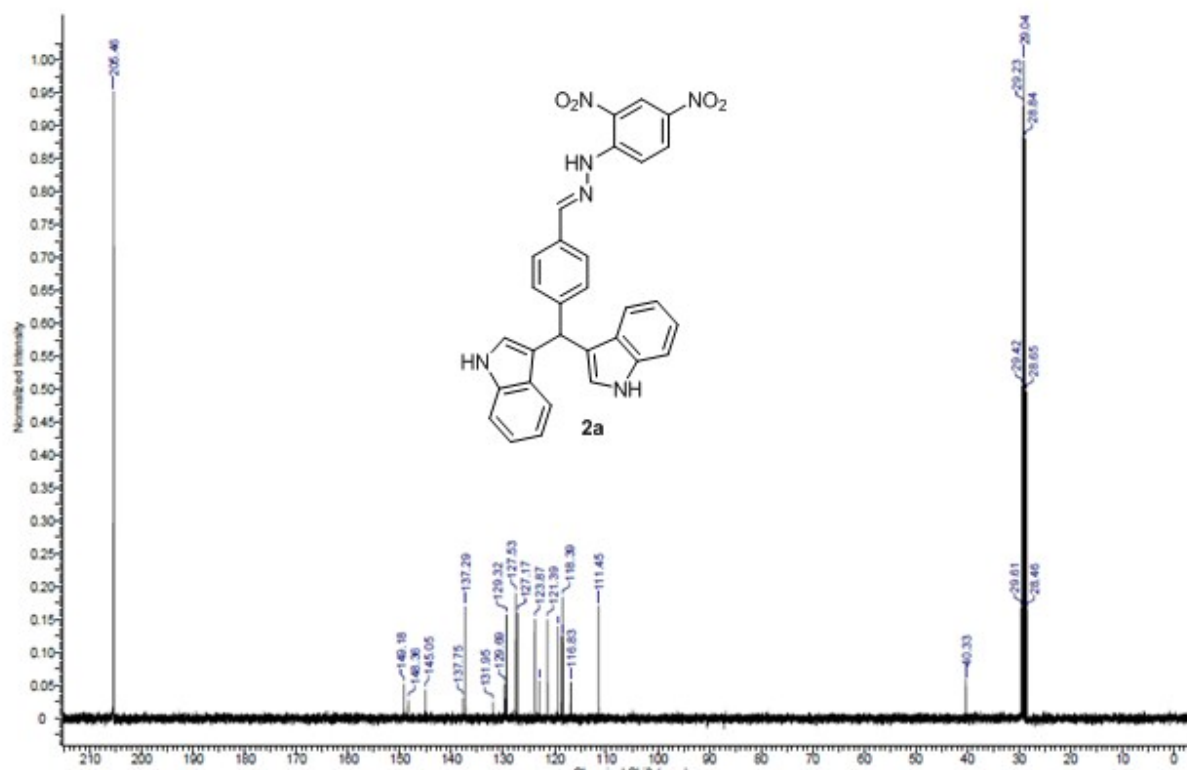

Fig. S2.  $^1\text{H}$  and  $^{13}\text{C}$  NMR data of compound **2a** in acetone- $\text{d}_6$ .

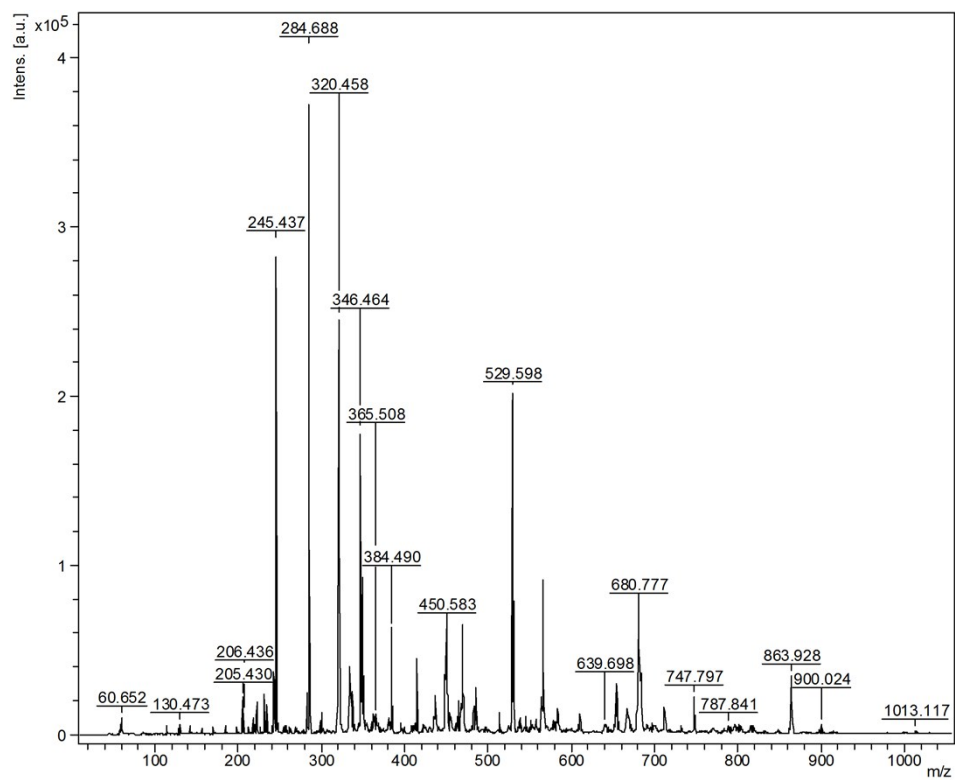

Fig. S3. MALDI-TOF of compound 2a.

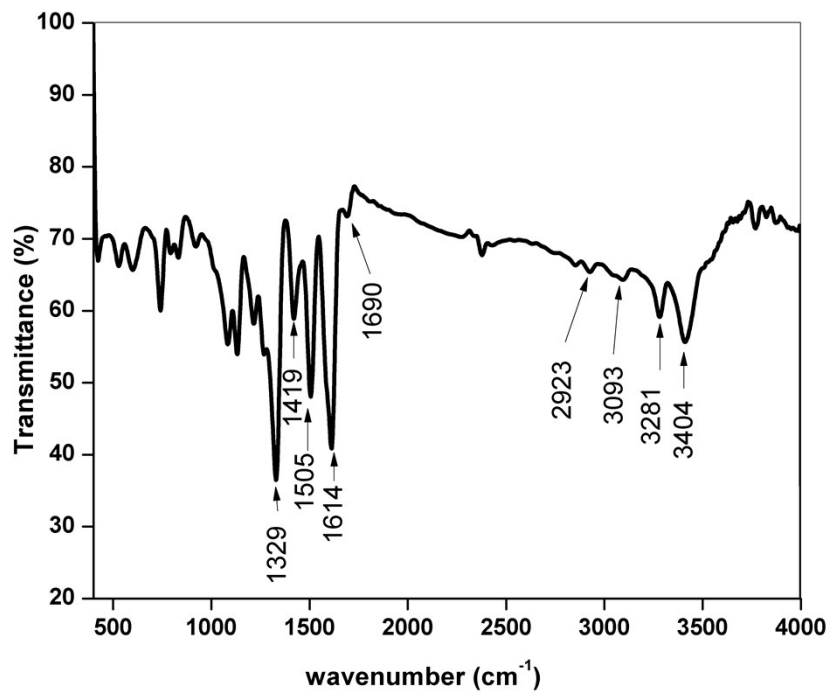

Figure S4. FTIR spectrum of compound 1a.

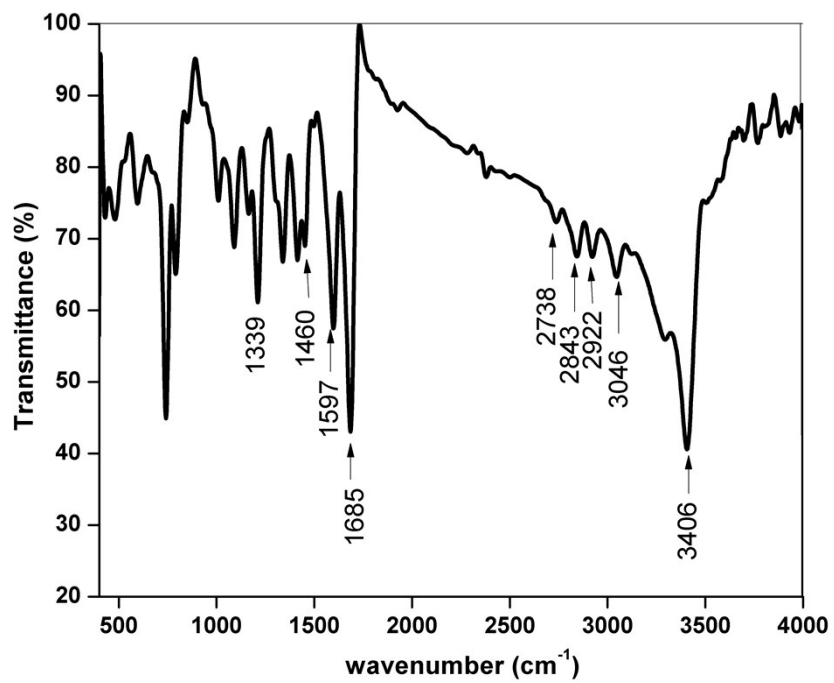

*Figure S5.* FTIR spectrum of compound 2a.
